# Supplementary material for: The exception that proves the rule: Virulence gene expression at the onset of Plasmodium falciparum blood stage infections
Source: PubMed Central journal article supplement (PMC10337978; doi:10.1371/journal.ppat.1011468), 2023-06-29

### MAVACHE

Sequential optimization of dose and schedule of PfSPZ Vaccine, verified by randomized, controlled, double-blind immunization and controlled human malaria infection in malaria-naïve, healthy adult volunteers in Germany

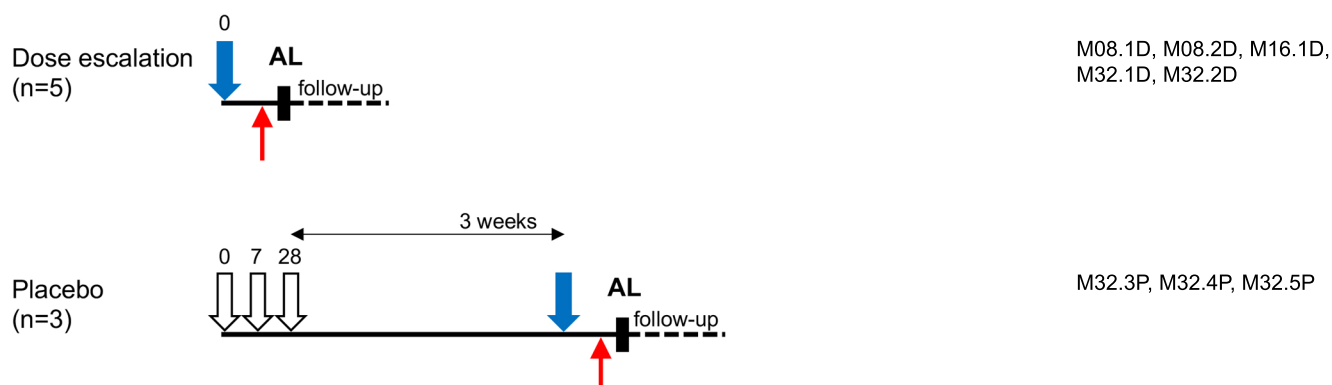

### CVac-Tü3

Safety and protective efficacy of a simplified *P. falciparum* sporozoite Chemoprophylaxis Vaccine (PfSPZ-CVac) regimen in healthy malaria-naïve adults in Germany

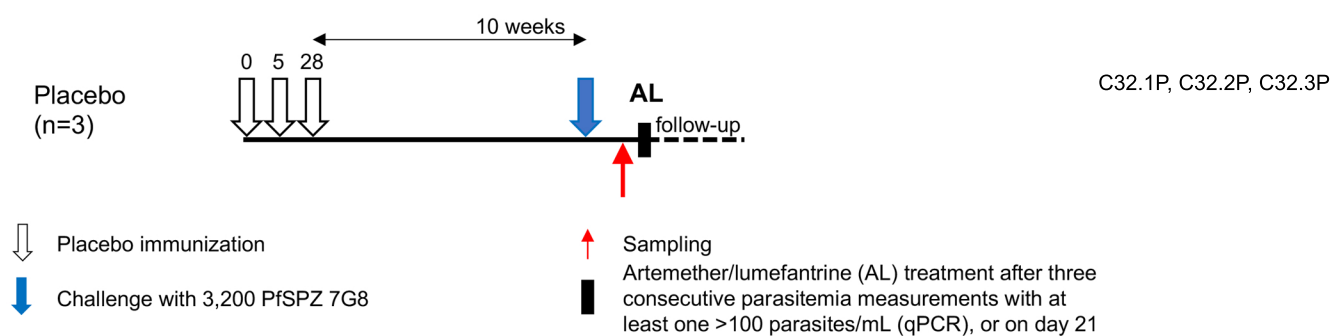

Supplement: ppat.1011468.s001.pdf [file ppat.1011468.s001.pdf]
