# Supplementary material for: The exception that proves the rule: Virulence gene expression at the onset of Plasmodium falciparum blood stage infections
Source: PubMed Central journal article supplement (PMC10337978; doi:10.1371/journal.ppat.1011468), 2023-06-29

Figure S6

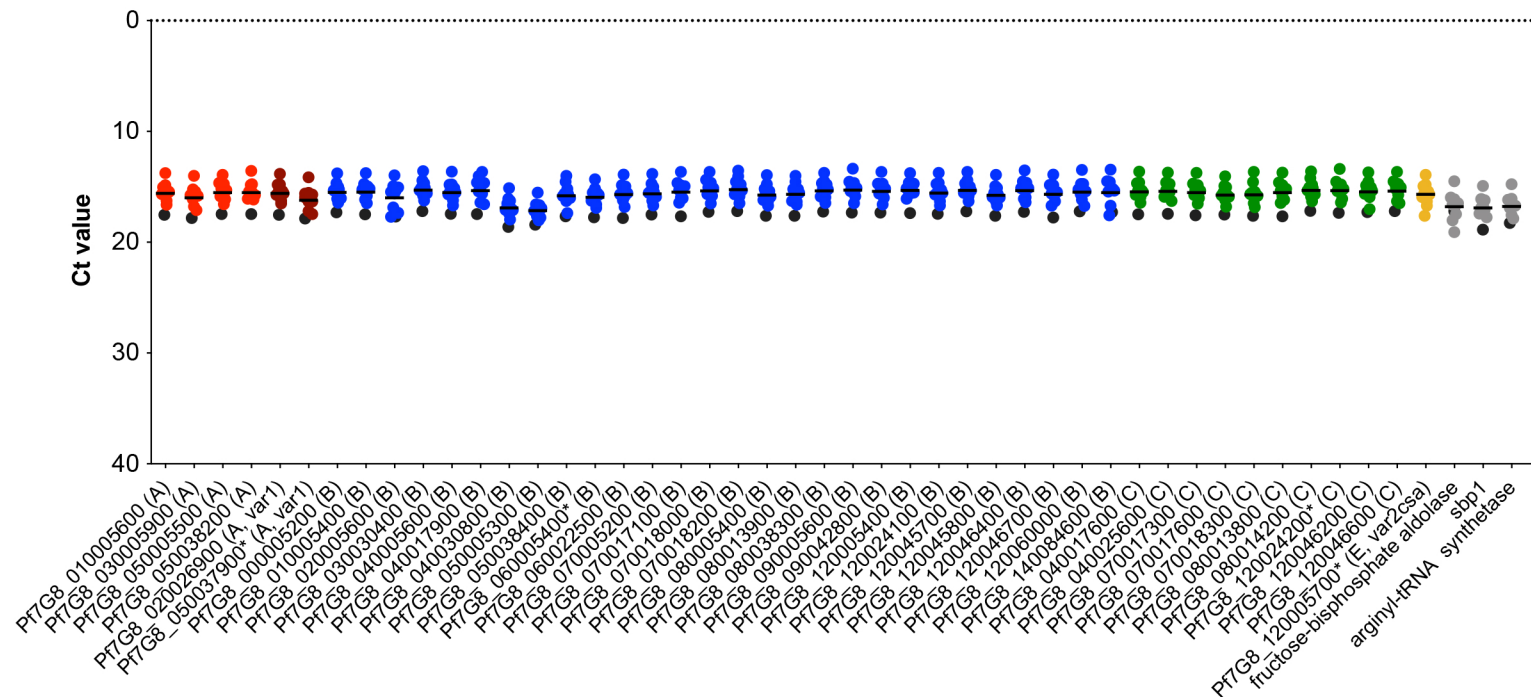

Supplement: ppat.1011468.s006.pdf [file ppat.1011468.s006.pdf]
